# Supplementary material
Source: Elsevier journal article supplement (https://www.sciencedirect.com/science/article/pii/S0213911112002270)
Supplement: mmc1 [file S0213911112002270:mmc1.doc]

**Table I**

Questions analysed according the type and dimension of continuity of care.

| **Type of continuity** | **Dimension of continuity** | **Survey question** |
| --- | --- | --- |
| RC | Consistency of personnel | As a result of your medical condition, how many doctors from the health centre have you seen in the last year? |
| As a result of your medical condition, how many specialist doctors have treated you as an outpatient in the last year? |
| Patient-provider relationship | Who is/are the person(s) responsible for managing (treating) your medical condition? |
| IC | Transfer of medical information | Was the specialist who saw you aware of the reason why your GP sent you? |
| Was the specialist aware of the results of the tests which were performed on you in primary care? |
| Was your GP aware of the instructions which you were given by the specialist? |
| Was your GP aware of the treatment prescribed to you by the specialist? |
| MC | Accessibility | How many days did it take from requesting an appointment until you saw your GP? |
| How many days did it take from requesting an appointment until you saw the specialist? |
| What is your view on the amount of waiting time from requesting an appointment until being seen? |
| Consistency of care | Did your GP send you to see the specialist? |
| Did the specialist send you for check-ups with your GP? |
| Did your GP resolve any doubts regarding your visit to the specialist? |
| Do you think that your care was well coordinated in the transition from your GP to the specialist? |
| Do you think your care was well coordinated in the transition from the specialist to your GP? |

IC: informational continuity; MC: managerial continuity; RC: relational continuity.

The CCAENA questionnaire® is available at: http://www.consorci.org/publicacions/cataleg-de-publicacions/instruments/questionari-ccaena.

**Table II**

Elements of continuity of care experienced by patients in care level transitions.

| **Type of continuity** | **Continuity elements (n)** | **Category** | **n** | **%** | **CIa** |
| --- | --- | --- | --- | --- | --- |
| RC | Professional responsible for the care (n=1497) | GP | 206 | 13.7 | 12.0-15.4 |
|  | SC physician | 609 | 40.7 | 38.2-43.2 |
|  | Both | 674 | 45.0 | 42.5-47.5 |
|  | Other | 8 | 0.6 | 0.2-1.0 |
| Number of GP consulted in the last year (n=1498) | 1 | 1193 | 79.7 | 77.7-81.7 |
|  | 2 | 225 | 15.0 | 13.2-16.8 |
|  | ≥3 | 79 | 5.2 | 4.1-6.3 |
| Number of SCb physicians consulted in the last year (n=1438) | 1 | 1221 | 84.9 | 83.0-86.8 |
|  | 2 | 154 | 10.7 | 9.1-12.3 |
|  | ≥3 | 63 | 4.4 | 3.3-5.5 |
| IC | The SC physician was aware of the reason for their visit (n=749) | Yes | 614 | 82.0 | 79.2-84.8 |
| The SC physician was aware of the tests done at PC level (n=533) | Yes | 435 | 81.5 | 78.2-84.8 |
| The GP was aware of the instructions given by the SC physician (n=644) | Yes | 524 | 81.3 | 78.3-84.3 |
| The GP was aware of the treatment prescribed by the SC physician (n=543) | Yes | 460 | 84.7 | 81.7-87.7 |
| MC | Waiting time SC (n=1002) | < 2 weeks | 209 | 20.9 | 18.4-23.4 |
|  | 2-4 weeks | 459 | 45.8 | 42.7-48.9 |
|  | 5-8 weeks | 172 | 17.2 | 14.9-19.5 |
|  | > 8 weeks | 162 | 16.1 | 13.8-18.4 |
| Waiting time PC (n=689) | < 3 days | 254 | 36.9 | 33.3-40.5 |
|  | 3-7 days | 311 | 45.2 | 41.5-48.9 |
|  | 8-14 days | 63 | 9.2 | 7.0-11.4 |
|  | > 14 days | 60 | 8.7 | 6.6-10.8 |
| Perception of waiting time SC (n=1001) | Adequate | 584 | 58.4 | 55.3-61.5 |
|  | Long | 260 | 26.0 | 23.3-28.7 |
|  | Excessive | 156 | 15.6 | 13.4-17.8 |
| Perception of waiting time PC (n=688) | Adequate | 557 | 80.9 | 78.0-83.8 |
|  | Long | 97 | 14.0 | 11.4-16.6 |
|  | Excessive | 35 | 5.0 | 3.4-6.6 |
| The visit to SC was due to a referral from the GP (n=1002) | Yes | 717 | 71.6 | 68.8-74.4 |
| The visit to PC was due to a referral from the SC physician (n=691) | Yes | 249 | 36.0 | 32.4-39.6 |
| PC resolved doubts regarding visit to the SC physician (n=413) | Yes | 363 | 87.9 | 84.8-91.0 |
| Perception of coordination from SC to PC (n=671) | Coordinated | 483 | 72.0 | 68.6-75.4 |
|  | Partially coordinated | 102 | 15.2 | 12.5-17.9 |
|  | No coordination | 86 | 12.8 | 10.3-15.3 |
| Perception of coordination from PC to SC (n=980) | Coordinated | 673 | 68.6 | 65,7-71,5 |
|  | Partially coordinated | 147 | 15.0 | 12,8-17,2 |
|  | No coordination | 160 | 16.4 | 14,1-18,7 |

CI, confidence interval; IC: informational continuity; MC: managerial continuity; PC: primary care; SC: secondary care; RC: relational continuity.

a Confidence interval calculated at 95% significance.

b Relating one medical specialization and the same cause of attendance.
